# Supplementary material for: Versatile labeling of multiple radionuclides onto a nanoscale metal–organic framework for tumor imaging and radioisotope therapy
Source: Royal Society of Chemistry journal article supplement (doi:10.1039/d0bm02225j), 2021-01-01
Supplement: d0bm02225j1.pdf [file d0bm02225j1.pdf]

## Supporting information

### **Versatile labeling of multiple radionuclides onto a nanoscale metal-organic framework for tumor imaging and radioisotope therapy**

Yugui Tao,<sup>a#</sup> Yuanchen Sun,<sup>a#</sup> Kexin Shi,<sup>b</sup> Pei Pei,<sup>b</sup> Fei Ge,<sup>a</sup> Kai Yang<sup>\*b</sup> and Teng Liu<sup>\*b</sup>

a. College of Biological and Chemical Engineering, Anhui Polytechnic University, Wuhu 241000, Anhui, China

b. State Key Laboratory of Radiation Medicine and Protection, School of Radiation Medicine and Protection & School for Radiological and Interdisciplinary Sciences (RAD-X), Collaborative Innovation Center of Radiation Medicine of Jiangsu Higher Education Institutions, Soochow University, Suzhou 215123, Jiangsu, China

E-mail: gerrylin@126.com, kyang@suda.edu.cn, tliu13@suda.edu.cn

<sup>#</sup>These authors contributed equally to this work.

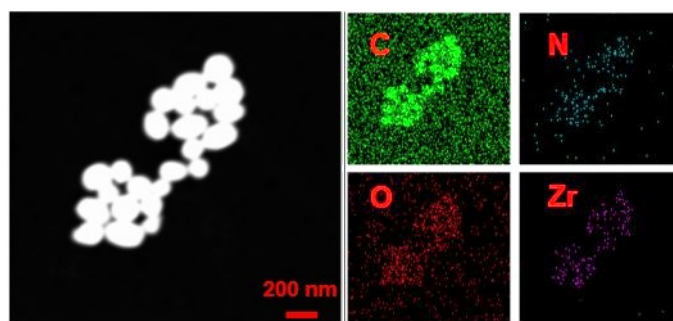

Figure S1. EDX elemental mapping image of PCN-224.

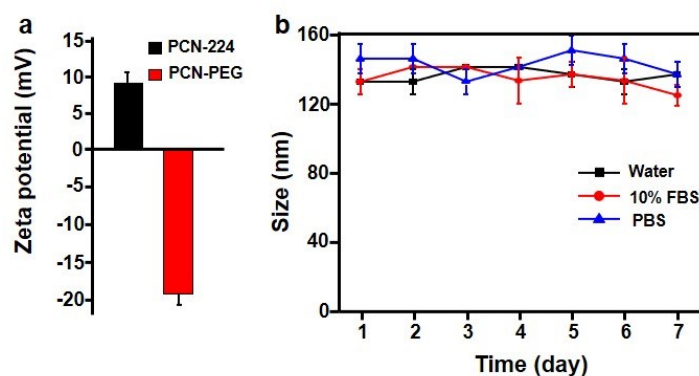

Figure S2. (a) Zeta potential of PCN-224 and PCN-PEG nanoparticles. (b) Hydrodynamic diameter of PCN-PEG in water, 10% FBS and PBS measured by dynamic laser scanning.

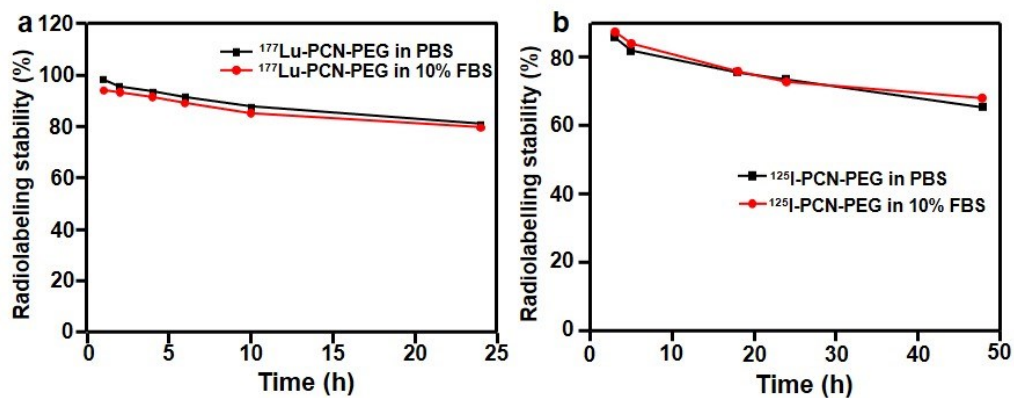

Figure S3. (a) Radiolabeling stability of <sup>177</sup>Lu-PCN-PEG for 24 h. (b) Radiolabeling stability of <sup>125</sup>I-PCN-PEG for 48 h.

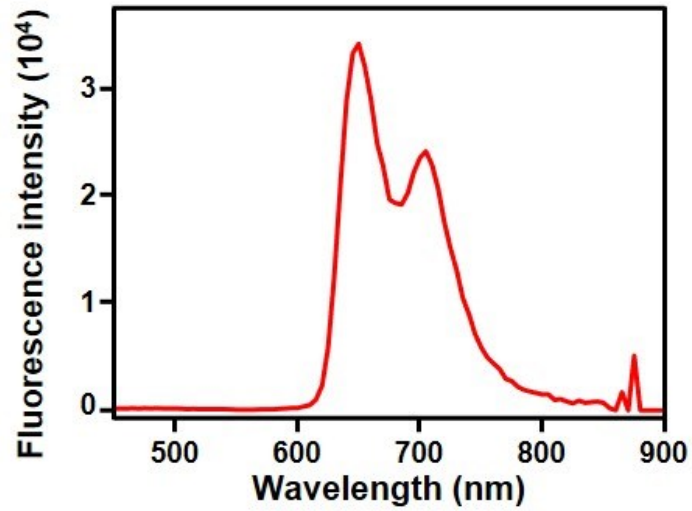

Figure S4. The fluorescent spectra of PCN-PEG solution under the excitation of 415-nm laser.

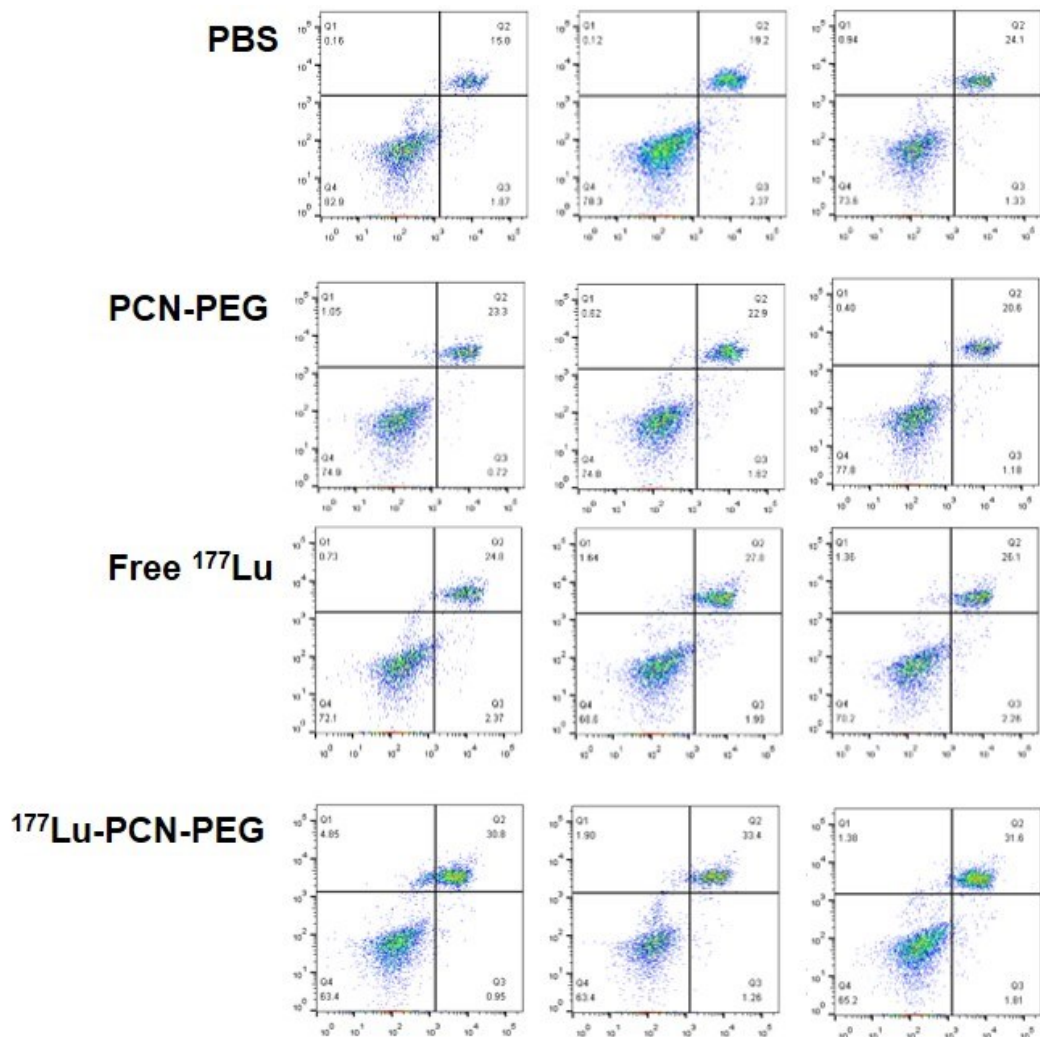

Figure S5. The flow cytometry analysis of 4T1 cells stained with FITC-Annexin V/PI kit after different treatments (20  $\mu\text{g mL}^{-1}$  of TCPP, 10  $\mu\text{Ci}$  of <sup>177</sup>Lu per well) for 24 h.

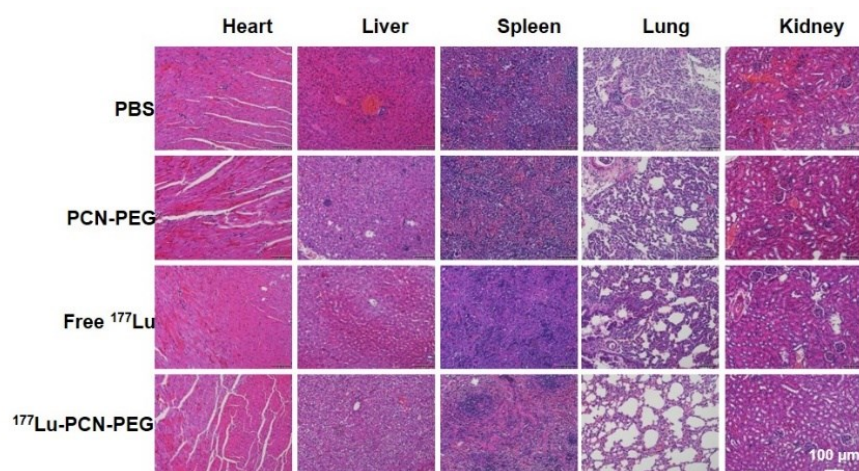

Figure S6. H&E stained slices of major tissues from mice 14 days after different treatments.

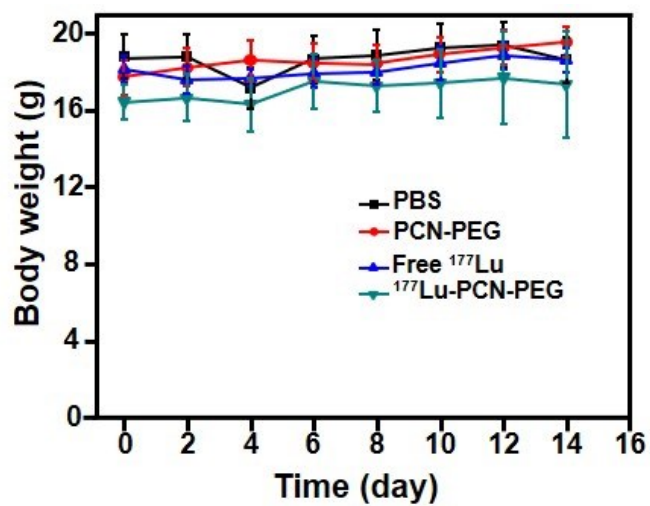

Figure S7. Average body weights of mice after different treatments.
